# Supplementary material for: A shift in PKM2 oligomeric state instructs adipocyte inflammatory potential
Source: JCI journal article supplement (doi:10.1172/jci.insight.185914), 2025-11-23

Figure 3D original blot PKM2

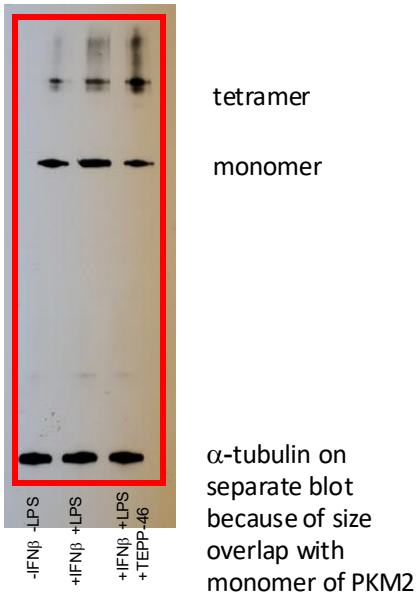

Supplement: sd2 [file 2]
